# Supplementary material for: Why is cancer not more common? A changing microenvironment may help to explain why, and suggests strategies for anti-cancer therapy
Source: bioRxiv or medRxiv preprint supplement (doi:10.1101/377226), 2019-08-30
Supplement: Supplementary file [file 377226-2.pdf]

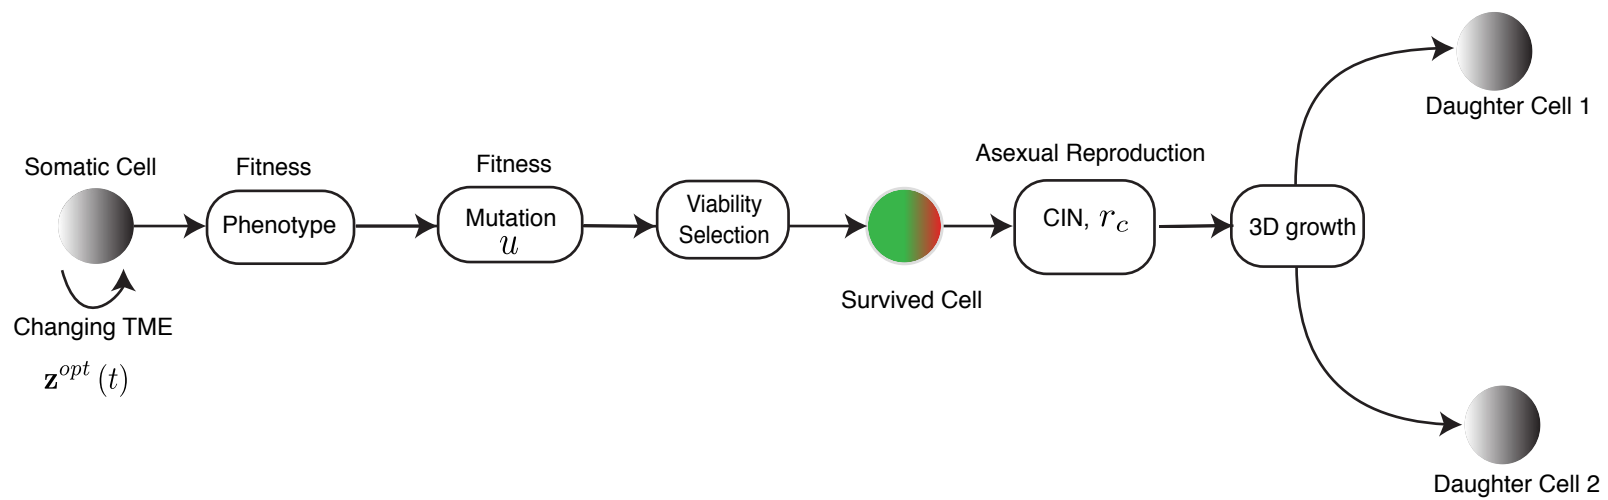

### Symbols and Abbreviations:

$\mathbf{z}^{opt}(t)$  Tumour microenvironment (TME) changing dynamics

$u$  Mutation rate

$r_c$  Chromosome instability (CIN) rate
