# Supplementary material for: Why is cancer not more common? A changing microenvironment may help to explain why, and suggests strategies for anti-cancer therapy
Source: bioRxiv or medRxiv preprint supplement (doi:10.1101/377226), 2019-08-30

**a**  $\sigma^2 = 10$

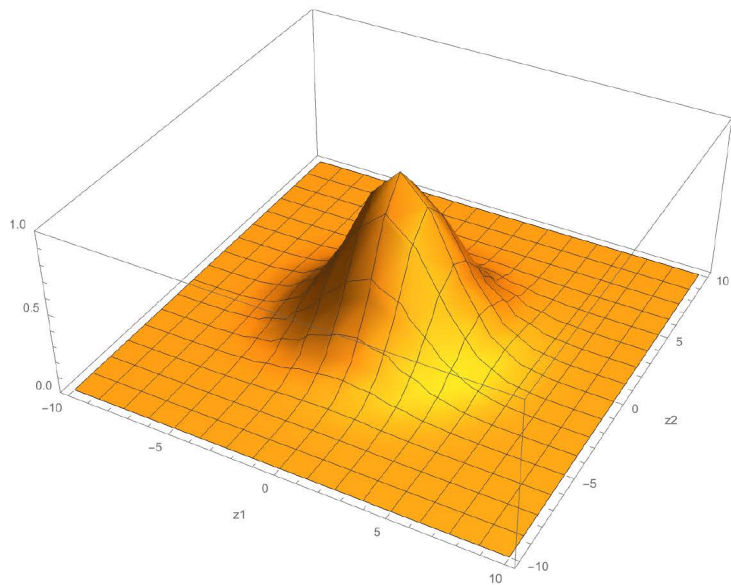

**b**  $\sigma^2 = 40$

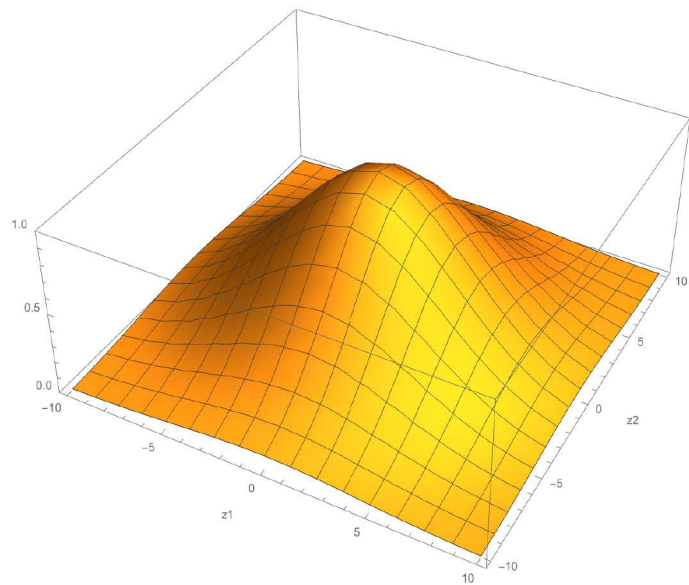

**c**  $\sigma^2 = 70$

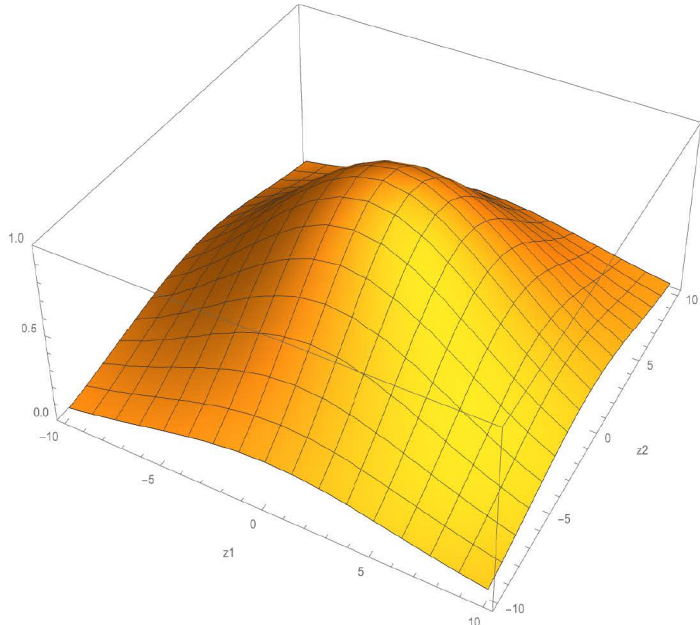

**d**  $\sigma^2 = 100$

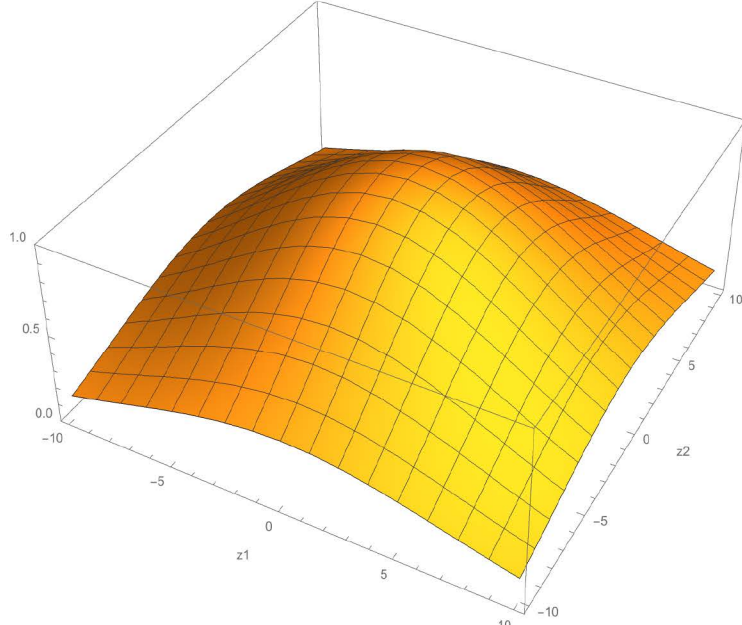

**e**  $\sigma^2 = 10, \rho_S = 0.9$

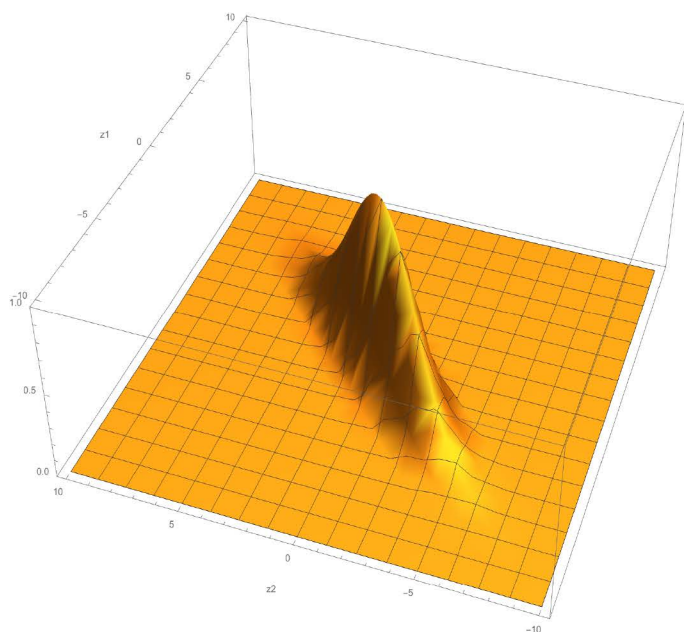

**f**  $\sigma^2 = 10, \rho_S = 0.5$

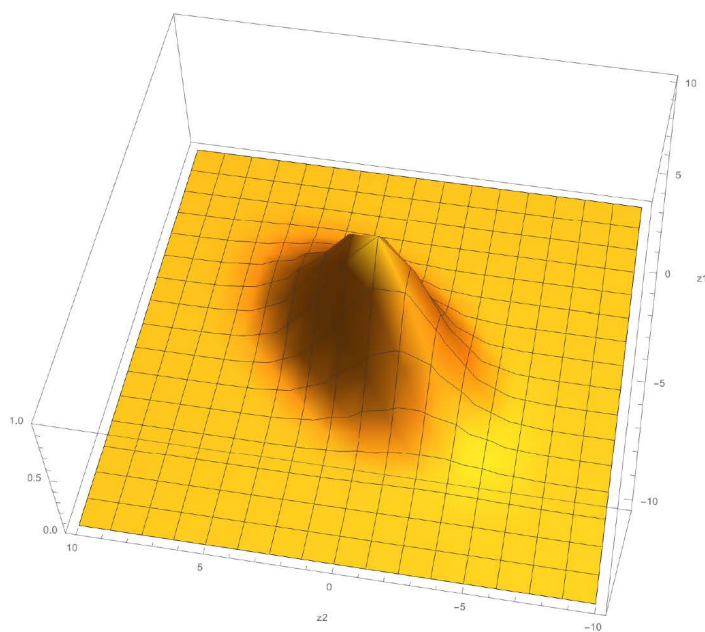

Supplement: Supplementary file [file 377226-3.pdf]
