# Supplementary material for: Why is cancer not more common? A changing microenvironment may help to explain why, and suggests strategies for anti-cancer therapy
Source: bioRxiv or medRxiv preprint supplement (doi:10.1101/377226), 2019-08-30

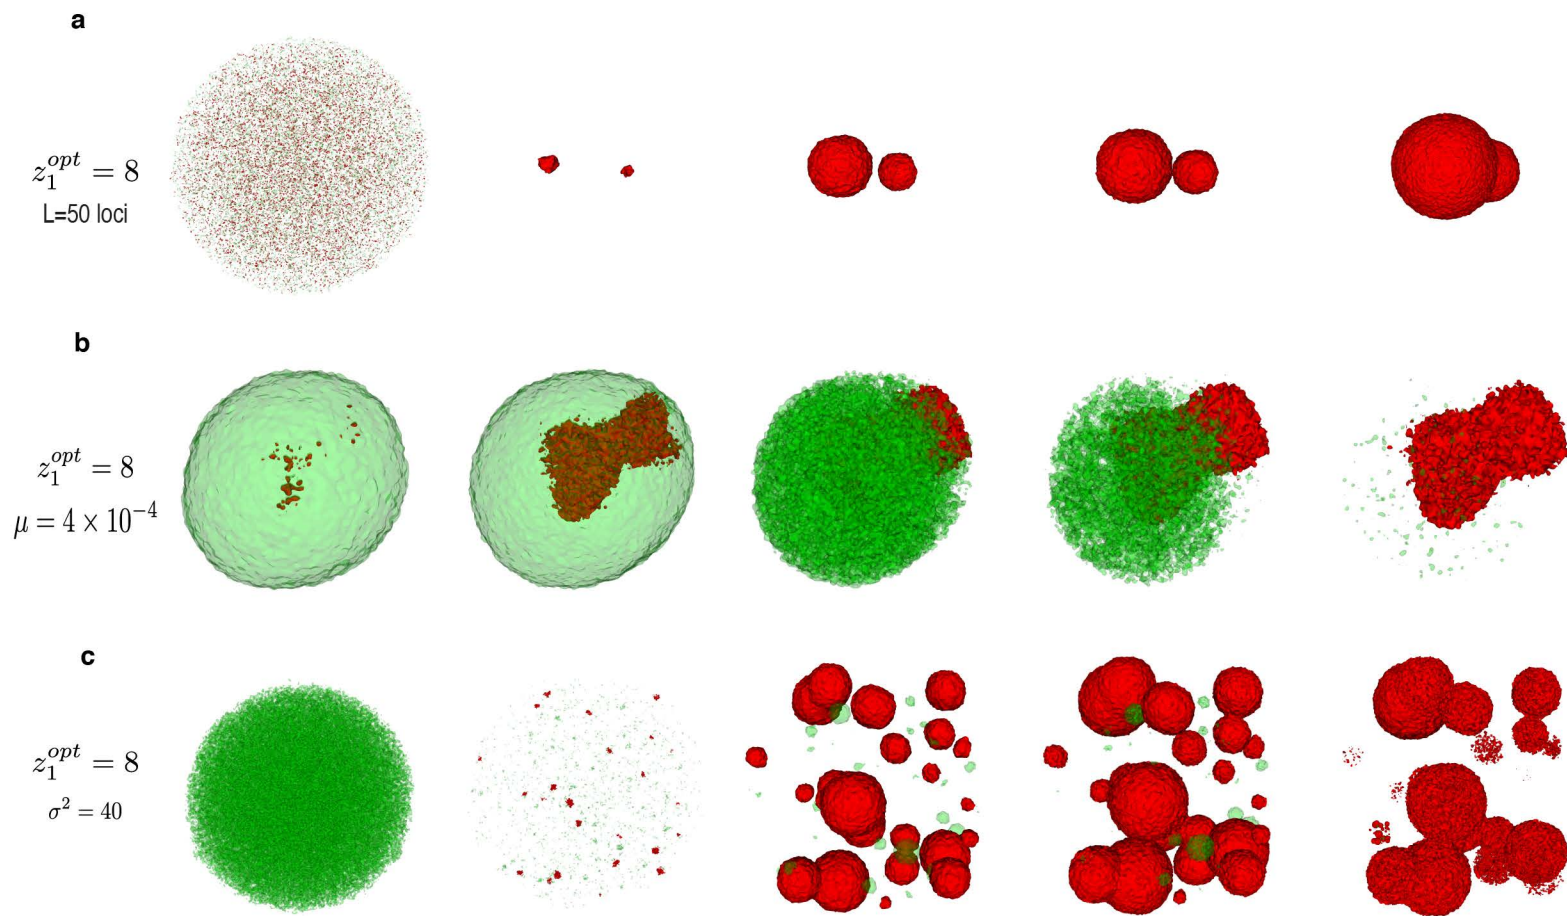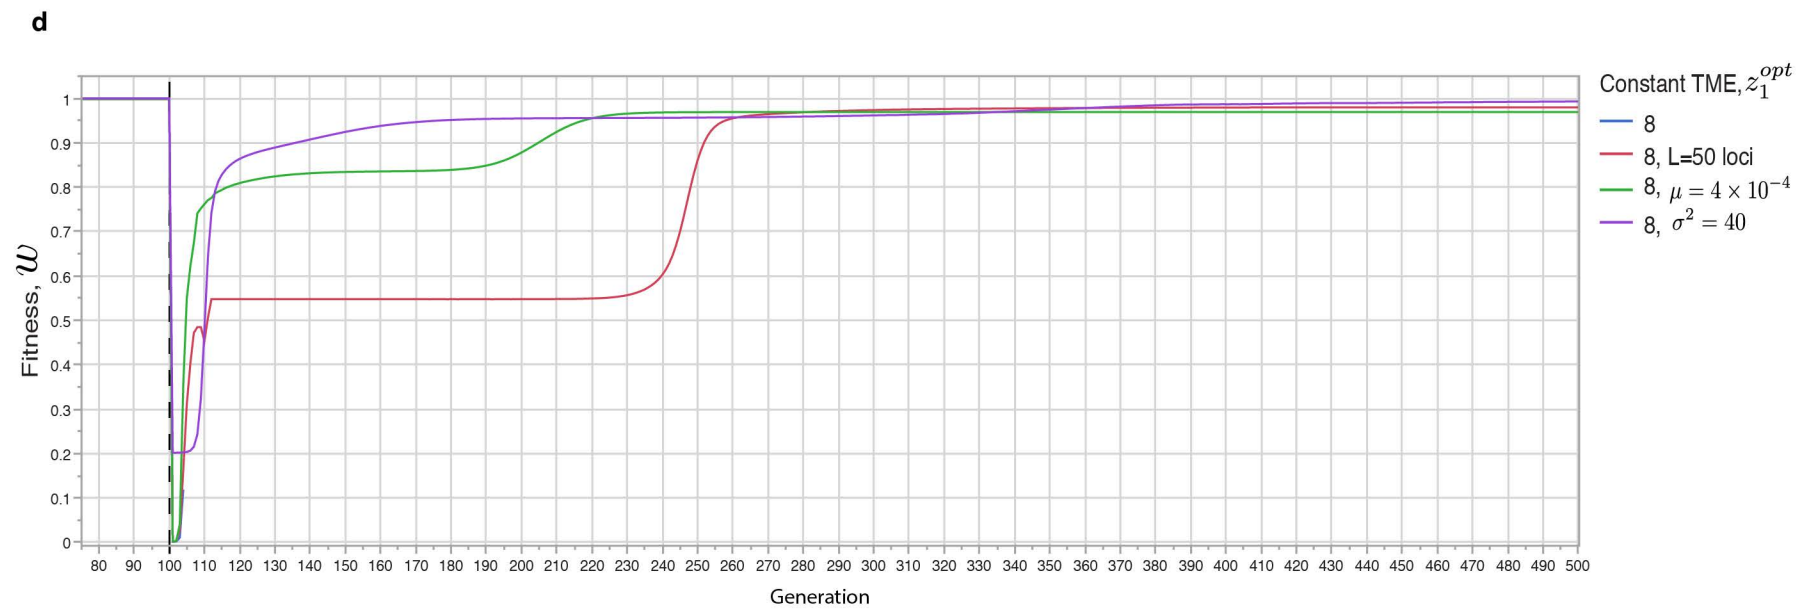

Supplement: Supplementary file [file 377226-13.pdf]
